# Supplementary material for: Episomal Vectors for Stable Production of Recombinant Proteins and Engineered Antibodies
Source: MDPI journal article supplement (doi:10.3390/antib13010018), 2024-03-11
Supplement: s1 [file s1]

**Table S1.** Signal peptide library of all peptides used that had predicted +1/+2 QA cleavage residues matching those of Srt4M Δ59.

| Signal Peptide (SP) Sequence | Protein Name                               | Species                | Uniprot Accession | SP Length | Size (w/ SP) |
|------------------------------|--------------------------------------------|------------------------|-------------------|-----------|--------------|
| MNYTSYLAFQLCVILCSSGYC        | IFN-γ                                      | Ailuropoda melanoleuca | Q4ZH68            | 23        | 166          |
| MASGVITITLAIIFALEINA         | Complement component C9                    | Rattus norvegicus      | Q62930            | 20        | 554          |
| MEHKVICVLAVVLMFAFGSLA        | Trefoil Factor 1                           | Mus musculus           | Q08423            | 21        | 87           |
| MLAEWGACLLLAVALGPGQLQA       | CUB domain containing protein 2            | Homo sapiens           | Q5VXM1            | 22        | 449          |
| MILSLFLSLGGPLGWLLGAWA        | Multimerin-2                               | Homo sapiens           | Q9H8L6            | 22        | 949          |
| MKALPALPLMLMLSMPPPCAP        | Microfibril-associated glycoprotein 4      | Mus Musculus           | Q9D1H9            | 22        | 257          |
| MRLLVLAALLTVGAG              | Phospholipase A2                           | Bos taurus             | P00593            | 15        | 145          |
| MKALLTFGLSLLAALQA            | Von Ebner gland protein 1                  | Ratus rattus           | P20289            | 18        | 177          |
| MGTLQGLLLWLLGTGGA            | lutropin subunit beta                      | Oryctolagus cuniculus  | Q6IY74            | 18        | 141          |
| MKFVPCLLLVTLSCGLTLG          | fibroblast growth factor binding protein 2 | Homo Sapiens           | Q9BYJ0            | 19        | 223          |
| MAWTPLLLFLSHCTGSLS           | Immunoglobulin lambda variable 5-45        | Homo sapiens           | A0A087WSX0        | 19        | 123          |
| MAWTPLFLFLTCCPGSNS           | Immunoglobulin lambda variable 7-46        | Homo sapiens           | A0A075B6I9        | 19        | 117          |
| MVSVPTTWCSVALALLVALHEGKG     | Endothelin-2                               | Homo sapiens           | P20800            | 24        | 178          |
| MSGIGWQTLSSLGLVLSILNKVAP     | Slit homolog 2                             | Mus musculus           | Q9R1B9            | 25        | 1521         |
| MPGIKRLTVTILALCLPSPGNA       | Fibulin-5                                  | Homo sapiens           | Q9UBX5            | 23        | 448          |
| MVMLLLLLSALAGLFGAAEG         | Apolipoprotein D                           | Homo sapiens           | P05090            | 20        | 189          |
| METQRASLCLGRWSLWLLLLALVVPASA | Prophenin-2                                | Sus scrofa             | P51525            | 29        | 228          |

**Table S2.** Signal peptides that were found after nanopore sequencing of PCR amplified DNA from cells selected with 20 ug/mL of puromycin for over 5 months.

| Sequence              | Protein                                    | Species               | # of reads |
|-----------------------|--------------------------------------------|-----------------------|------------|
| MKALLTFGLSLLAALQA     | Von Ebner gland protein 1                  | Ratus rattus          | 27         |
| MEHKVICVLAVVLMFAFGSLA | trefoil factor 1                           | Mus Musculus          | 10         |
| MAWTPLFLFLTCCPGSNS    | Immunoglobulin lambda variable 7-46        | Homo Sapiens          | 6          |
| MKFVPCLLLVTLSCGLTLG   | fibroblast growth factor binding protein 2 | Homo Sapiens          | 2          |
| MGTLQGLLLWLLGTGGA     | lutropin subunit beta                      | Oryctolagus cuniculus | 2          |



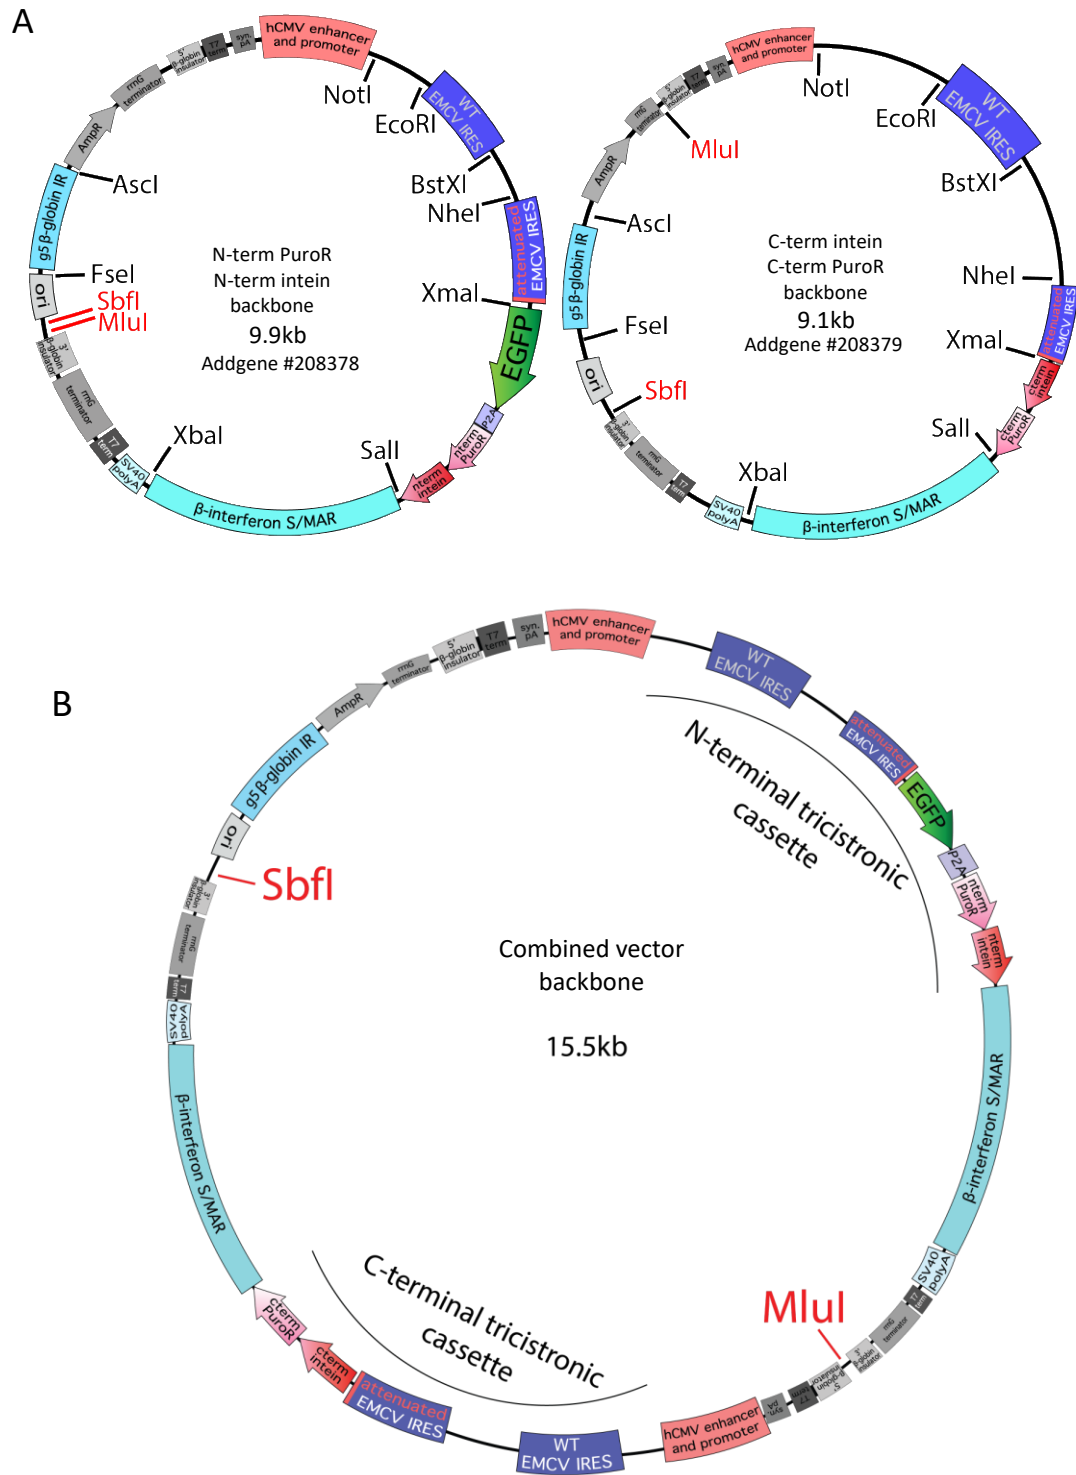

**Figure S2. Split intein vector backbone maps.** **A.** N-terminal PuroR N-terminal intein vector backbone with relevant unique restriction sites indicated (left). C-terminal intein C-terminal PuroR vector backbone with relevant unique restriction sites (right). SbfI and MluI sites are shown in red to highlight the different locations between the N-terminal and C-terminal plasmids whereas all other restriction enzyme sites are in identical locations in both plasmids. **B.** A combined vector containing both tricistronic cassettes linked to N- and C-terminal intein-puromycin cistrons.

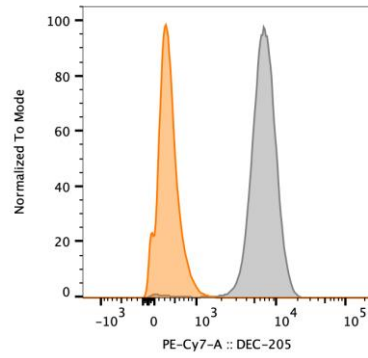

**Figure S3 Competitive DEC-205 staining of MutuDC cell line pre-treated with siRNA-conjugated  $\alpha$ -DEC-205 antibody.** MutuDC were pre-treated (orange) or not pre-treated (gray) with  $\alpha$ -DEC-205-siRNA at 5  $\mu$ g/ml for 10 mins and subsequently stained with anti-mouse DEC-205 PE-Cy7 (BioLegend 138209) following the manufacture's protocol. The overlaid histogram shows PE-Cy7 intensity as indicated.
